# Supplementary material
Source: PubMed Central journal article supplement (PMC4390256)

A

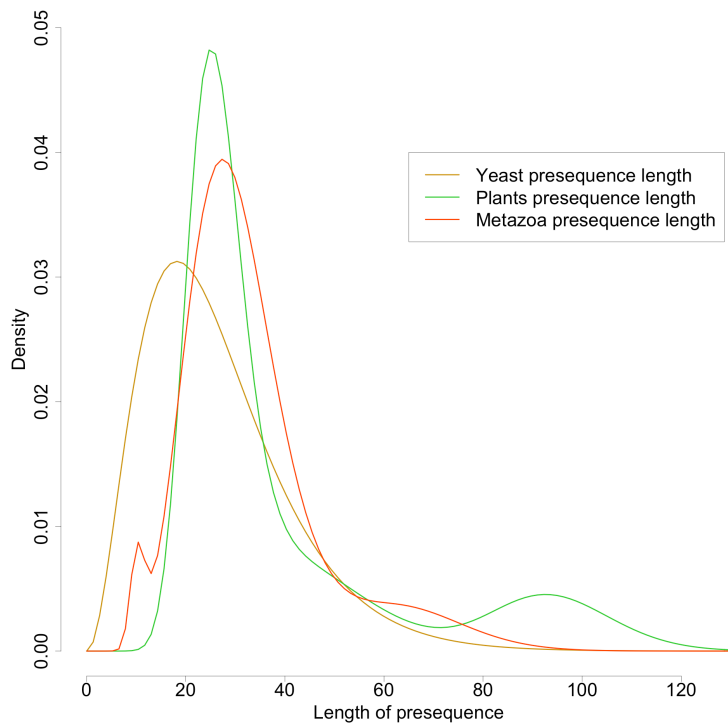

## Yeast

| Distribution      | P-value |
|-------------------|---------|
| Gamma 1-component | 0.88    |
| Gamma 2-component | 0.85    |
| Gamma 3-component | 0.78    |

## Plants

| Distribution      | P-value |
|-------------------|---------|
| Gamma 1-component | 0.02    |
| Gamma 2-component | 0.84    |
| Gamma 3-component | 0.98    |

## Metazoa

| Distribution      | P-value |
|-------------------|---------|
| Gamma 1-component | 0.29    |
| Gamma 2-component | 0.83    |
| Gamma 3-component | 0.92    |

B

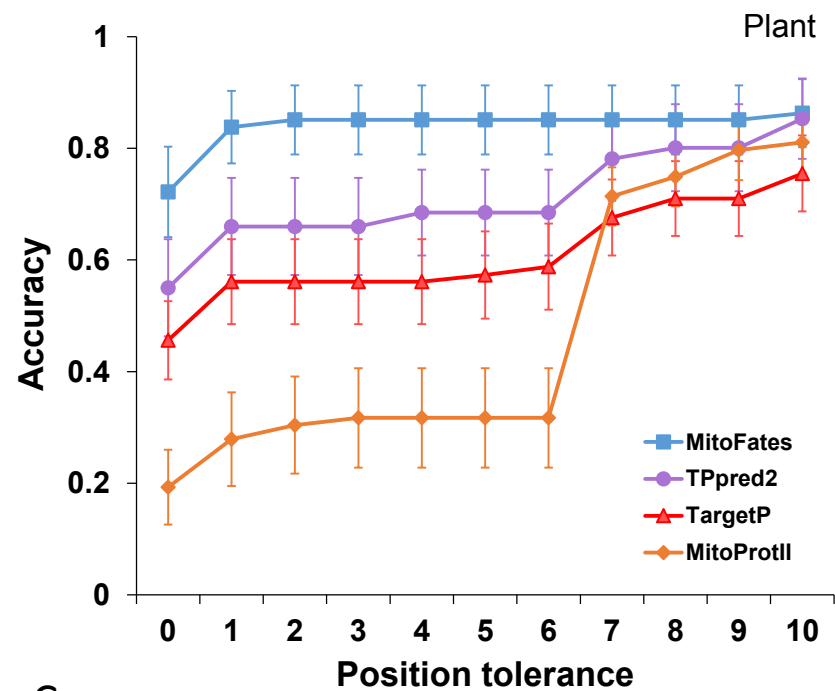

C

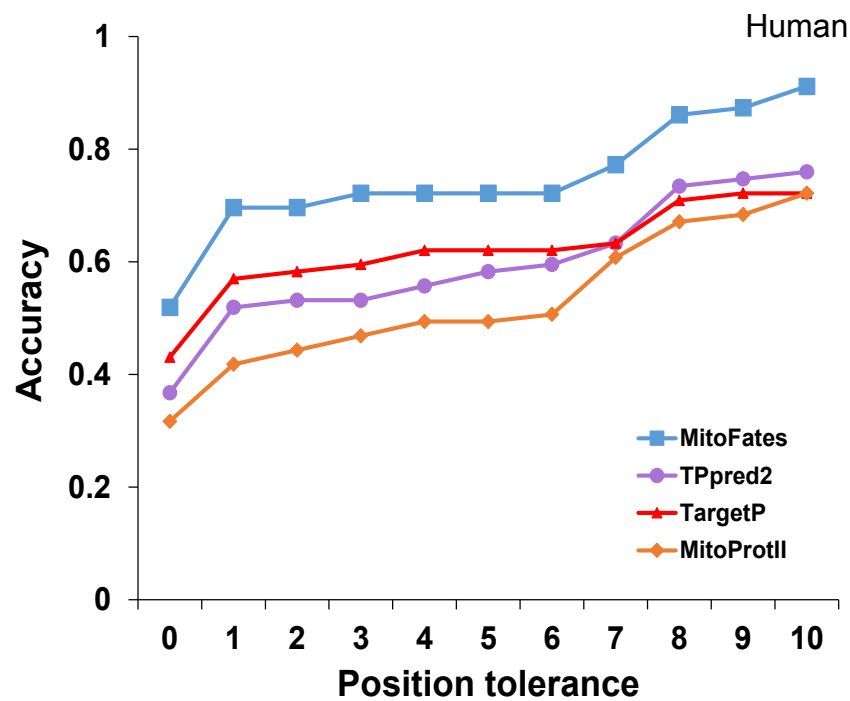

Supplement: supp_M114.043083_mcp.M114.043083-2.pdf [file supp_M114.043083_mcp.M114.043083-2.pdf]
