# Supplementary material
Source: PubMed Central journal article supplement (PMC4390256)
Supplement: supp_M114.043083_mcp.M114.043083-4.pdf [file supp_M114.043083_mcp.M114.043083-4.pdf]

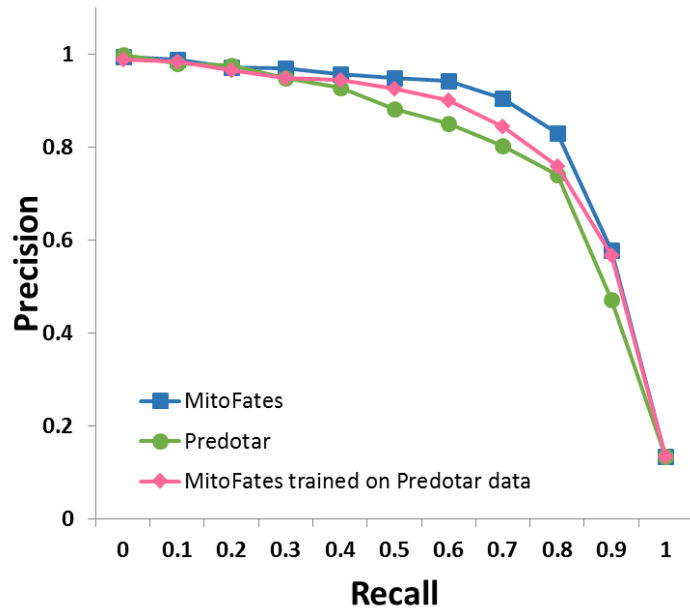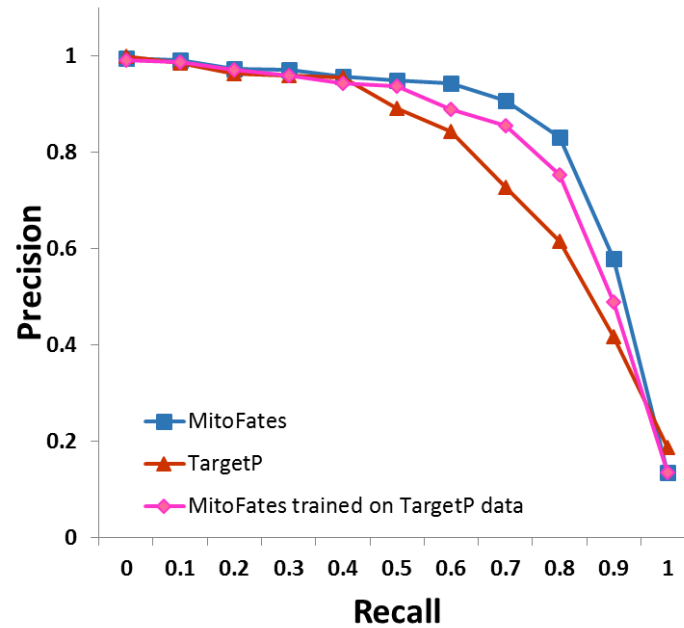

| Predictor                 | ROC AUC |
|---------------------------|---------|
| MitoFates                 | 0.954   |
| MitoFates (TargetP data)  | 0.946   |
| TargetP                   | 0.933   |
| MitoFates (Predotar data) | 0.945   |
| Predotar                  | 0.939   |
