# Supplementary material
Source: PubMed Central journal article supplement (PMC4390256)
Supplement: supp_M114.043083_mcp.M114.043083-6.pdf [file supp_M114.043083_mcp.M114.043083-6.pdf]

| Rank | 6-mer                             | P-value        | Coverage of Positive (%) | Coverage of Negative (%) | Helical wheel                                                                       | Sequence logo                                                                       | Rank | 6-mer                            | P-value        | Coverage of Positive (%) | Coverage of Negative (%) | Helical wheel                                                                         | Sequence logo                                                                         |
|------|-----------------------------------|----------------|--------------------------|--------------------------|-------------------------------------------------------------------------------------|-------------------------------------------------------------------------------------|------|----------------------------------|----------------|--------------------------|--------------------------|---------------------------------------------------------------------------------------|---------------------------------------------------------------------------------------|
| 1    | $\phi\phi\sigma\beta\phi\phi$     | <b>5.7E-13</b> | <b>12.9</b>              | <b>2.2</b>               | 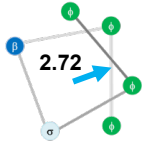   |    | 8    | $\phi\phi\beta\phi\phi\beta$     | <b>8.9E-07</b> | <b>6.3</b>               | <b>0.8</b>               |    |    |
| 2    | $\phi\phi\beta\sigma\phi\phi$     | <b>1.2E-11</b> | <b>11.4</b>              | <b>1.9</b>               |    |    | 9    | $\phi\sigma\beta\phi\phi\sigma$  | <b>9.7E-07</b> | <b>7.6</b>               | <b>1.3</b>               |    |    |
| 3    | $\phi\phi\phi\beta\sigma\phi$     | <b>1.1E-09</b> | <b>9.5</b>               | <b>1.5</b>               |    |    | 10   | $\sigma\phi\beta\beta\sigma\phi$ | <b>1.2E-06</b> | <b>6.6</b>               | <b>0.9</b>               |    |    |
| 4    | $\phi\phi\beta\sigma\phi\beta$    | <b>1.8E-09</b> | <b>6.3</b>               | <b>0.5</b>               |    |    | 11   | $\phi\beta\phi\phi\gamma\beta$   | <b>1.7E-06</b> | <b>3.8</b>               | <b>0.2</b>               |    |    |
| 5    | $\phi\beta\phi\phi\beta\gamma$    | <b>6.1E-09</b> | <b>4.4</b>               | <b>0.1</b>               |    |    | 12   | $\phi\phi\phi\phi\beta\beta$     | <b>4.9E-06</b> | <b>5.9</b>               | <b>0.8</b>               |    |    |
| 6    | $\beta\phi\phi\sigma\sigma\sigma$ | <b>9.3E-08</b> | <b>5.7</b>               | <b>0.5</b>               |   |   | 13   | $\phi\phi\beta\sigma\phi\sigma$  | <b>6.4E-06</b> | <b>6.3</b>               | <b>0.9</b>               |   |   |
| 7    | $\phi\phi\phi\beta\beta\phi$      | <b>1.2E-07</b> | <b>7.6</b>               | <b>1.1</b>               |  |  | 14   | $\beta\sigma\phi\beta\phi\phi$   | <b>9.3E-06</b> | <b>4.7</b>               | <b>0.4</b>               |  |  |
