# Supplementary material
Source: PubMed Central journal article supplement (PMC4390256)

Higher Cutoff = 0.5

Precision : 0.83

Recall : 0.73

MCC : 0.75

Default Cutoff = 0.385

Precision : 0.79

Recall : 0.80

MCC : 0.77

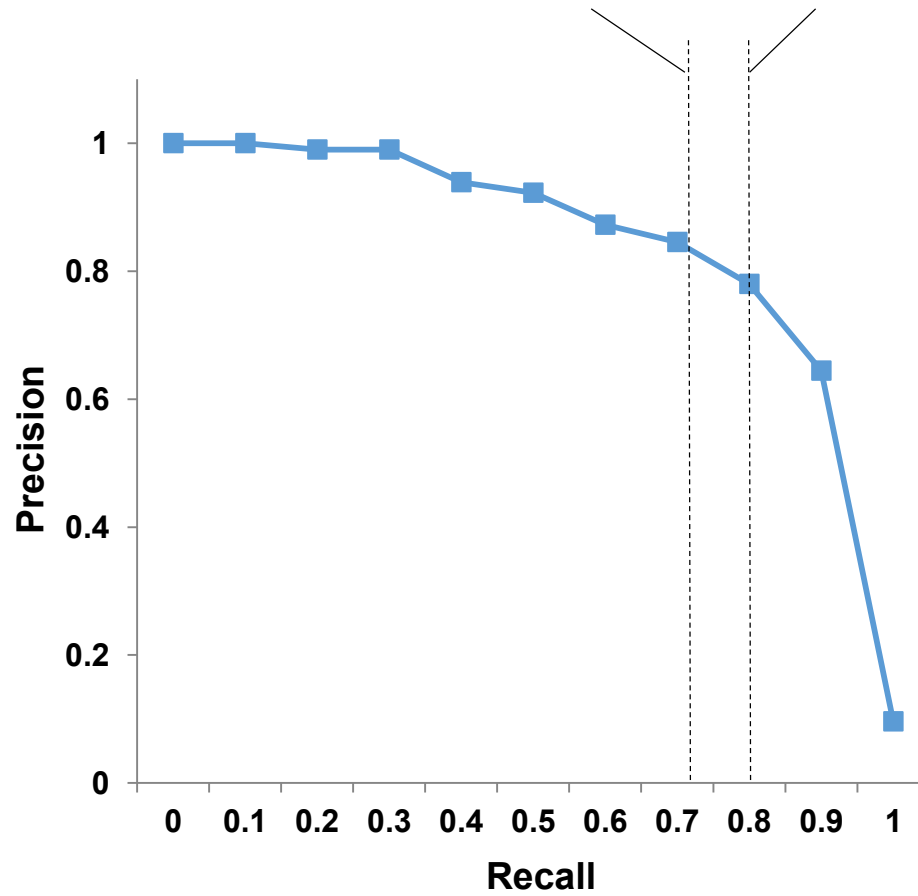

Supplement: supp_M114.043083_mcp.M114.043083-3.pdf [file supp_M114.043083_mcp.M114.043083-3.pdf]

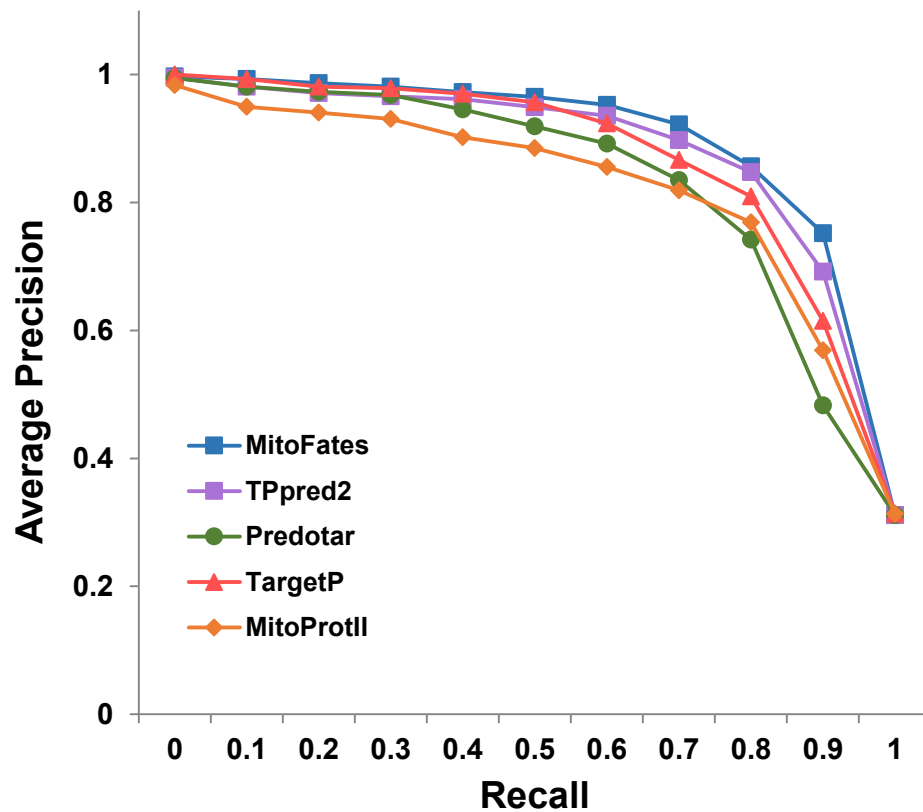

| Predictor                    | TP  | FN | TN   | FP  | ROC<br>AUC | MCC   |
|------------------------------|-----|----|------|-----|------------|-------|
| MitoFates<br>(cutoff: 0.385) | 147 | 79 | 6475 | 121 | 0.929      | 0.582 |
| TPpred2                      | 144 | 82 | 6461 | 135 | 0.921      | 0.567 |
| Predotar                     | 147 | 79 | 6250 | 346 | 0.887      | 0.413 |
| TargetP                      | 186 | 40 | 6044 | 552 | 0.918      | 0.426 |
| MitoProtII                   | 187 | 39 | 5770 | 826 | 0.898      | 0.353 |

Supplement: supp_M114.043083_mcp.M114.043083-5.pdf [file supp_M114.043083_mcp.M114.043083-5.pdf]

A

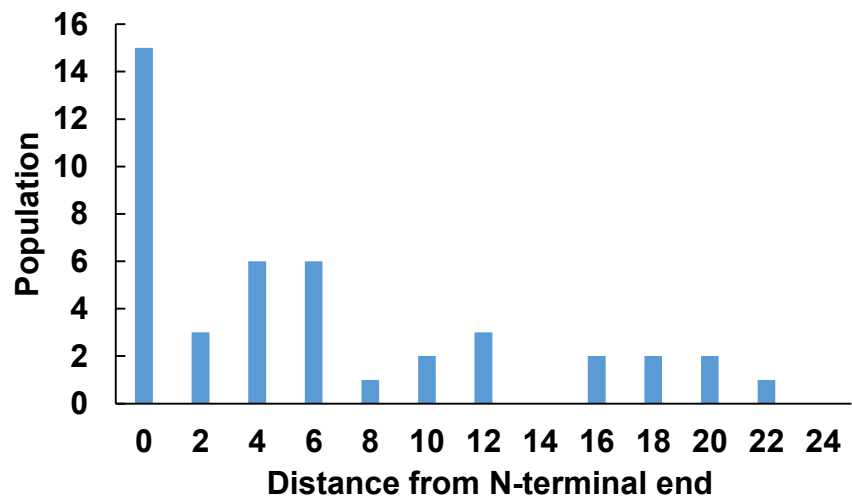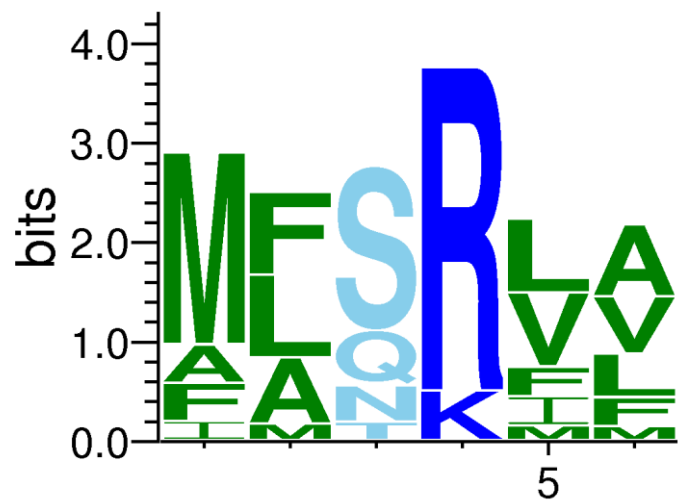

B

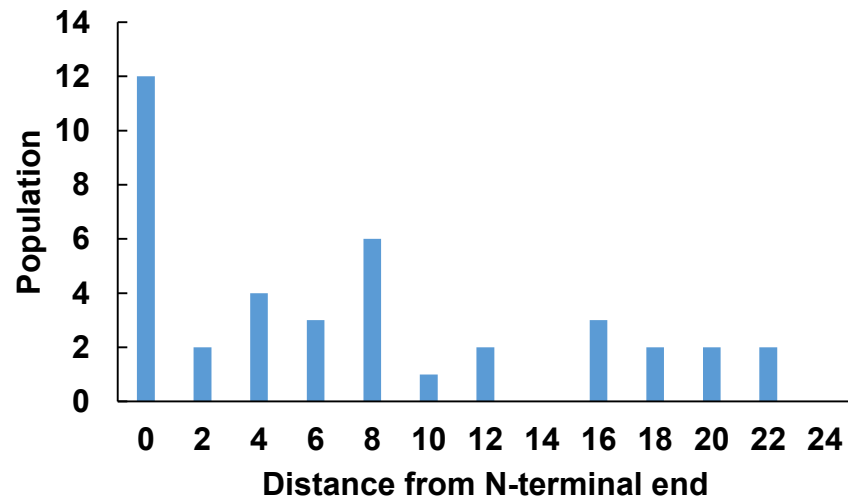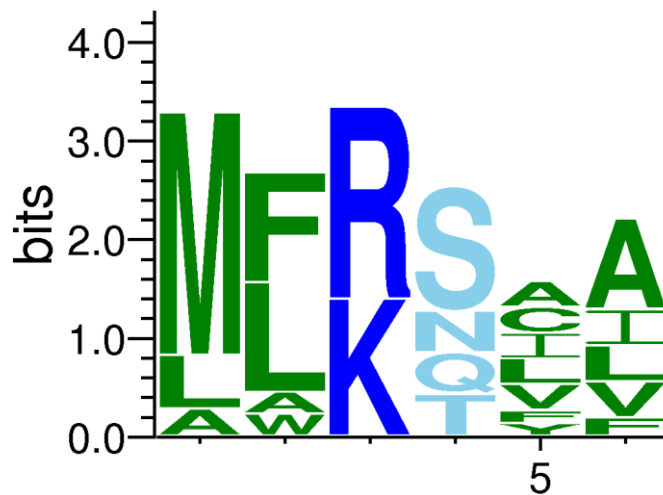

Supplement: supp_M114.043083_mcp.M114.043083-7.pdf [file supp_M114.043083_mcp.M114.043083-7.pdf]

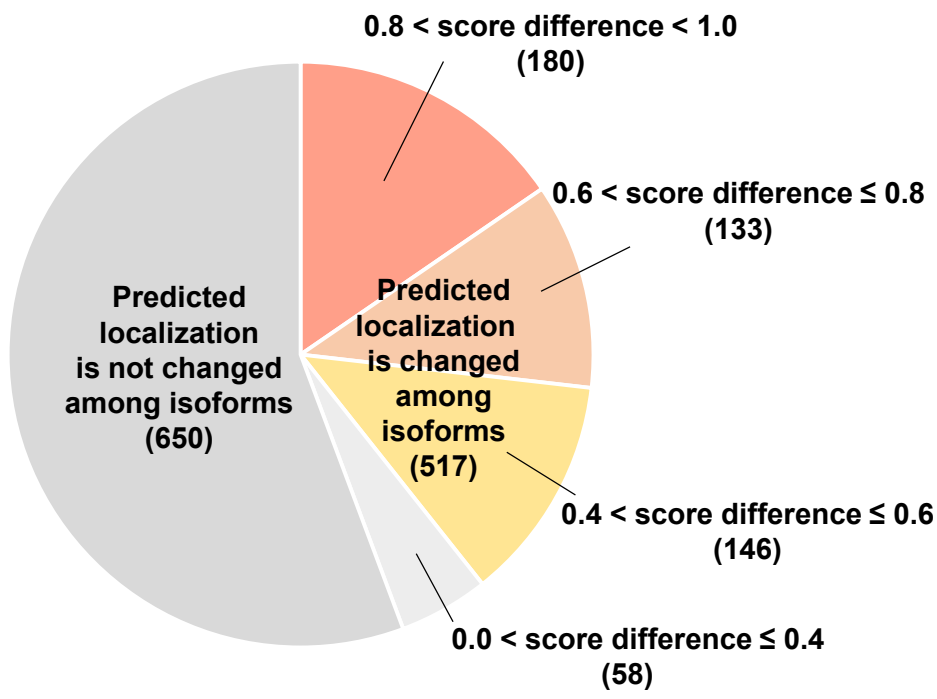

Supplement: supp_M114.043083_mcp.M114.043083-8.pdf [file supp_M114.043083_mcp.M114.043083-8.pdf]
